# Supplementary material for: Expression Profiling of the Slow Rusting Resistance Genes Lr34/Yr18 and Lr67/Yr46 in Common Wheat (Triticum aestivum L.) and Associated miRNAs Patterns
Source: MDPI journal article supplement (doi:10.3390/genes14071376), 2023-06-29
Supplement: s1 [file s1]

**Table S1.** Changes in expression levels post inoculation (i.e., relative to the first term) for the *Lr34* and *Lr67* genes.

|            |      | Change after inoculation <i>Lr34</i> | Normal distribution ( <i>Lr34</i> ) | Equality of variances ( <i>Lr34</i> ) | No difference between means ( <i>Lr34</i> ) | Correlation between <i>Lr34</i> and <i>Lr67</i> | Change after inoculation <i>Lr67</i> | Normal distribution ( <i>Lr67</i> ) | Equality of variances ( <i>Lr67</i> ) | No difference between means ( <i>Lr67</i> ) |
|------------|------|--------------------------------------|-------------------------------------|---------------------------------------|---------------------------------------------|-------------------------------------------------|--------------------------------------|-------------------------------------|---------------------------------------|---------------------------------------------|
| Line       | Time | T/0h <i>Lr34</i>                     | Kolmogorov-Smirnov test             | Levene's test                         | Two-tailed t-Student test                   | 0.675191992                                     | T/0h <i>Lr67</i>                     | Kolmogorov-Smirnov test             | Levene's test                         | Two-tailed t-Student test                   |
| Artigas    | 00h  |                                      | 0.33063                             |                                       |                                             |                                                 |                                      | 0.64822                             |                                       |                                             |
| Artigas    | 06h  | 0.66                                 |                                     | 0.8877                                | 0.378182                                    |                                                 | 0.73                                 |                                     | 0.3277                                | 0.478664                                    |
| Artigas    | 12h  | 0.33                                 |                                     | 0.7626                                | 0.09917                                     |                                                 | 0.29                                 |                                     | 0.1986                                | 0.09688                                     |
| Artigas    | 24h  | 0.49                                 |                                     | 0.6482                                | 0.160616                                    |                                                 | 0.42                                 |                                     | 0.5631                                | 0.20285                                     |
| Artigas    | 48h  | 1.25                                 |                                     | 0.6301                                | 0.63467                                     |                                                 | 1.90                                 |                                     | 0.4418                                | 0.068915                                    |
| Glenlea    | 00h  |                                      | 0.46378                             |                                       |                                             |                                                 |                                      | 0.7998                              |                                       |                                             |
| Glenlea    | 06h  | 1.06                                 |                                     | 0.3846                                | 0.909998                                    |                                                 | 1.75                                 |                                     | 0.3065                                | 0.352663                                    |
| Glenlea    | 12h  | 0.36                                 |                                     | 0.3172                                | 0.013023                                    |                                                 | 0.65                                 |                                     | 0.8707                                | 0.372808                                    |
| Glenlea    | 24h  | 1.01                                 |                                     | 0.6651                                | 0.98669                                     |                                                 | 0.28                                 |                                     | 0.6244                                | 0.049027                                    |
| Glenlea    | 48h  | 1.40                                 |                                     | 0.4119                                | 0.750744                                    |                                                 | 1.47                                 |                                     | 0.44                                  | 0.411655                                    |
| Lerma Rojo | 00h  |                                      | 0.24242                             |                                       |                                             |                                                 |                                      | 0.64438                             |                                       |                                             |
| Lerma Rojo | 06h  | 0.05                                 |                                     | 0.2972                                | 0.032906                                    |                                                 | 0.13                                 |                                     | 0.5463                                | 0.020879                                    |
| Lerma Rojo | 12h  | 0.23                                 |                                     | 0.3515                                | 0.062264                                    |                                                 | 0.59                                 |                                     | 0.9217                                | 0.246334                                    |
| Lerma Rojo | 24h  | 1.00                                 |                                     | 0.5129                                | 0.991322                                    |                                                 | 0.13                                 |                                     | 0.3339                                | 0.015846                                    |
| Lerma Rojo | 48h  | 0.07                                 |                                     | 0.3566                                | 0.036737                                    |                                                 | 0.40                                 |                                     | 0.9401                                | 0.102186                                    |
| NP846      | 00h  |                                      | 0.54593                             |                                       |                                             |                                                 |                                      | 0.2528                              |                                       |                                             |
| NP846      | 06h  | 0.54                                 |                                     | 0.4925                                | 0.247717                                    |                                                 | 0.57                                 |                                     | 0.5177                                | 0.215078                                    |
| NP846      | 12h  | 0.15                                 |                                     | 0.2011                                | 0.047787                                    |                                                 | 0.09                                 |                                     | 0.1792                                | 0.002264                                    |
| NP846      | 24h  | 0.49                                 |                                     | 0.3626                                | 0.191111                                    |                                                 | 0.23                                 |                                     | 0.3396                                | 0.005186                                    |
| NP846      | 48h  | 0.04                                 |                                     | 0.1585                                | 0.03256                                     |                                                 | 0.30                                 |                                     | 0.7344                                | 0.035289                                    |
| TX89D6 435 | 00h  |                                      | 0.02799                             |                                       |                                             |                                                 |                                      | 0.36779                             |                                       |                                             |
| TX89D6 435 | 06h  | 0.53                                 |                                     | 0.5764                                | 0.602064                                    |                                                 | 0.28                                 |                                     | 0.3695                                | 0.104686                                    |
| TX89D6 435 | 12h  | 0.33                                 |                                     | 0.3729                                | 0.442623                                    |                                                 | 0.04                                 |                                     | 0.1228                                | 0.037423                                    |
| TX89D6 435 | 24h  | 0.32                                 |                                     | 0.376                                 | 0.435676                                    |                                                 | 0.41                                 |                                     | 0.2006                                | 0.140425                                    |
| TX89D6 435 | 48h  | 0.26                                 |                                     | 0.4265                                | 0.404337                                    |                                                 | 0.87                                 |                                     | 0.7883                                | 0.816887                                    |
| Artigas*   | 00h  |                                      | 0.96761                             |                                       |                                             |                                                 |                                      | 0.47516                             |                                       |                                             |
| Artigas*   | 06h  | 0.76                                 |                                     | 0.2669                                | 0.489588                                    |                                                 | 0.99                                 |                                     | 0.222                                 | 0.982821                                    |
| Artigas*   | 12h  | 1.41                                 |                                     | 0.5659                                | 0.080655                                    |                                                 | 1.05                                 |                                     | 0.4515                                | 0.642097                                    |
| Artigas*   | 24h  | 0.78                                 |                                     | 0.188                                 | 0.556859                                    |                                                 | 0.77                                 |                                     | 0.3577                                | 0.614254                                    |
| Artigas*   | 48h  | 0.67                                 |                                     | 0.3095                                | 0.241431                                    |                                                 | 0.83                                 |                                     | 0.1485                                | 0.614593                                    |

**Table S2.** PCR product sequences for *Lr34* and *Lr67* genes.

| Gene        | Line     | Sequences                                                                                                                                                                                                                                                |
|-------------|----------|----------------------------------------------------------------------------------------------------------------------------------------------------------------------------------------------------------------------------------------------------------|
| <i>Lr34</i> | Artigas* | <b><u>GGTAGTAGCAGTTGAAGCTTCAGAGCGAAGCCTACAGACAGATTATATTTGAAGGT</u></b><br>ACCCCTTGCCAAAACATCTAAGTTTATGCATAACTTGGTGCTGAAGGCAGATAGGAA<br>CAAGATACTAACAGAATCACAATACTGATTTATTTGTAGATCATGGGGCTAGAGATA<br>TGCGCAGACACGATGGTT <b><u>GGGGATGCAATGAGAAGAG</u></b> |
|             | Glenlea  | GGTAGTAGCAGTTGAAGCTTCAGAGCGAAGCCTACAGACAGATTATATTTGAAGGT<br>AaCtCTTGCCAAAACATaTAAGTTTATGCATAACTTGGTGCTGAAGGCAGATAGGAA<br>CAAtATACTAACAGAATCACAcTACTGATTTATTTGTAGATCATGGGGCTAGAGAcAT<br>GCGCAGACACGATGGTTGGGGATGCAATGAGAAGAG                              |
| <i>Lr67</i> | Artigas* | <b><u>CGCCATCTTCATCTTCTTCTCGGCSTGGGTGCTCGTCATGTCCGTCTTCGTGCTCTTCTT</u></b><br>CCTCCCGGAGACCAAGAACGTGCCCATCGAGGAGATGACCG <b><u>GACAAGGTGTGGAAGC</u></b><br><b><u>AG</u></b>                                                                               |
|             | Glenlea  | <b><u>CGCCATCTTCATCTTCTTCTCGGCSTGGGTGCTCGTCATGTCCGTCTTCGTGCTCTTCTT</u></b><br>CCTCCCGGAGACCAAGAACGTGCCCATCGAGGAGATGACCG <b><u>GACAAGGTGTGGAAGC</u></b><br><b><u>AG</u></b>                                                                               |

**Table S3.** Change in expression levels after inoculation (i.e., relative to the first term) for reference genes *TUB $\beta$*  and *ARF*.

|            |      | Difference after inoculation <i>TUB<math>\beta</math></i> | Change after inoculation <i>TUB<math>\beta</math></i> | Normal distribution ( <i>TUB<math>\beta</math></i> ) | Equality of variances ( <i>TUB<math>\beta</math></i> ) | No difference between means ( <i>TUB<math>\beta</math></i> ) | Difference after inoculation <i>ARF</i> | Change after inoculation <i>ARF</i> | Normal distribution ( <i>ARF</i> ) | Equality of variances ( <i>ARF</i> ) | No difference between means ( <i>ARF</i> ) | No difference between means - both references |
|------------|------|-----------------------------------------------------------|-------------------------------------------------------|------------------------------------------------------|--------------------------------------------------------|--------------------------------------------------------------|-----------------------------------------|-------------------------------------|------------------------------------|--------------------------------------|--------------------------------------------|-----------------------------------------------|
| Line       | Time | Cq_T - Cq_00h                                             | Cq_T / Cq_00h                                         | Kolmogorov-Smirnov test                              | Levene's test                                          | Two-tailed t-Student test                                    | Cq_T - Cq_00h                           | Cq_T / Cq_00h                       | Kolmogorov-Smirnov test            | Levene's test                        | Two-tailed t-Student test                  | Two-tailed t-Student test                     |
| Artigas    | 00h  |                                                           |                                                       | 0.95454                                              |                                                        |                                                              |                                         |                                     | 0.22863                            |                                      |                                            |                                               |
| Artigas    | 06h  | 1.593                                                     | 1.05431201                                            |                                                      | 0.1626                                                 | 0.030043                                                     | 0.960                                   | 1.032989691                         |                                    | 0.2906                               | 0.223486                                   | 0.043641                                      |
| Artigas    | 12h  | -0.847                                                    | 0.971139643                                           |                                                      | 0.7089                                                 | 0.410666                                                     | -1.437                                  | 0.950630011                         |                                    | 0.4596                               | 0.263805                                   | 0.298333                                      |
| Artigas    | 24h  | 1.633                                                     | 1.055675491                                           |                                                      | 0.9521                                                 | 0.076802                                                     | 1.297                                   | 1.044558992                         |                                    | 0.7223                               | 0.033396                                   | 0.042652                                      |
| Artigas    | 48h  | -0.920                                                    | 0.968639927                                           |                                                      | 0.7187                                                 | 0.400171                                                     | -0.857                                  | 0.970561283                         |                                    | 0.3809                               | 0.415778                                   | 0.376787                                      |
| Glenlea    | 00h  |                                                           |                                                       | 0.6789                                               |                                                        |                                                              |                                         |                                     | 0.23878                            |                                      |                                            |                                               |
| Glenlea    | 06h  | 1.487                                                     | 1.051123338                                           |                                                      | 0.4082                                                 | 0.050354                                                     | 0.127                                   | 1.004286037                         |                                    | 0.8069                               | 0.840002                                   | 0.066806                                      |
| Glenlea    | 12h  | 1.637                                                     | 1.056281522                                           |                                                      | 0.2962                                                 | 0.034952                                                     | 0.420                                   | 1.014211595                         |                                    | 0.5766                               | 0.504937                                   | 0.021232                                      |
| Glenlea    | 24h  | 1.377                                                     | 1.047340669                                           |                                                      | 0.8298                                                 | 0.158302                                                     | 2.453                                   | 1.08301376                          |                                    | 0.4407                               | 0.11911                                    | 0.099561                                      |
| Glenlea    | 48h  | -0.880                                                    | 0.969738652                                           |                                                      | 0.4112                                                 | 0.474999                                                     | -1.567                                  | 0.946988495                         |                                    | 0.2305                               | 0.190415                                   | 0.308638                                      |
| Lerma Rojo | 00h  |                                                           |                                                       | 0.86625                                              |                                                        |                                                              |                                         |                                     | 0.62449                            |                                      |                                            |                                               |
| Lerma Rojo | 06h  | 1.057                                                     | 1.038114705                                           |                                                      | 0.7891                                                 | 0.064677                                                     | 2.130                                   | 1.07596291                          |                                    | 0.4908                               | 0.555619                                   | 0.425315                                      |
| Lerma Rojo | 12h  | 0.723                                                     | 1.026091139                                           |                                                      | 0.8683                                                 | 0.243417                                                     | 0.993                                   | 1.035425583                         |                                    | 0.5303                               | 0.265889                                   | 0.179071                                      |
| Lerma Rojo | 24h  | 3.157                                                     | 1.113863172                                           |                                                      | 0.9314                                                 | 0.002255                                                     | 3.110                                   | 1.110912981                         |                                    | 0.3869                               | 0.012561                                   | 0.004638                                      |
| Lerma Rojo | 48h  | -1.030                                                    | 0.96284718                                            |                                                      | 0.7944                                                 | 0.121469                                                     | -1.130                                  | 0.959700428                         |                                    | 0.3783                               | 0.193768                                   | 0.1482                                        |
| NP846      | 00h  |                                                           |                                                       | 0.85829                                              |                                                        |                                                              |                                         |                                     | 0.89651                            |                                      |                                            |                                               |
| NP846      | 06h  | 1.983                                                     | 1.069925961                                           |                                                      | 0.272                                                  | 0.007126                                                     | 1.097                                   | 1.039758308                         |                                    | 0.4756                               | 0.075348                                   | 0.008003                                      |
| NP846      | 12h  | 1.230                                                     | 1.043365848                                           |                                                      | 0.4395                                                 | 0.013219                                                     | 1.830                                   | 1.066344411                         |                                    | 0.7153                               | 0.022311                                   | 0.015284                                      |
| NP846      | 24h  | 2.243                                                     | 1.079092725                                           |                                                      | 0.2413                                                 | 0.048836                                                     | 3.767                                   | 1.136555891                         |                                    | 0.604                                | 0.018252                                   | 0.025251                                      |
| NP846      | 48h  | -1.523                                                    | 0.946292161                                           |                                                      | 0.2628                                                 | 0.200372                                                     | -0.713                                  | 0.974138973                         |                                    | 0.729                                | 0.250815                                   | 0.184133                                      |
| TX 89D6435 | 00h  |                                                           |                                                       | 0.99762                                              |                                                        |                                                              |                                         |                                     | 0.87176                            |                                      |                                            |                                               |
| TX 89D6435 | 06h  | 3.440                                                     | 1.128855038                                           |                                                      | 0.8188                                                 | 0.013352                                                     | 4.010                                   | 1.154210999                         |                                    | 0.9203                               | 0.116369                                   | 0.055147                                      |
| TX 89D6435 | 12h  | 1.290                                                     | 1.048320639                                           |                                                      | 0.3196                                                 | 0.119505                                                     | 1.480                                   | 1.05691578                          |                                    | 0.1836                               | 0.348178                                   | 0.234443                                      |
| TX 89D6435 | 24h  | 2.690                                                     | 1.100761643                                           |                                                      | 0.8005                                                 | 0.028141                                                     | 3.527                                   | 1.135623638                         |                                    | 0.2058                               | 0.061867                                   | 0.041902                                      |
| TX 89D6435 | 48h  | 1.220                                                     | 1.045698589                                           |                                                      | 1                                                      | 0.247515                                                     | 2.333                                   | 1.089732086                         |                                    | 0.7659                               | 0.251491                                   | 0.234053                                      |
